# Supplementary material
Source: PubMed Central journal article supplement (PMC4933306)
Supplement: NIHMS754962-supplement-SI.pdf [file NIHMS754962-supplement-SI.pdf]

Supporting Information for “Identification of New and Distinctive Exposures from Little Cigars”

Theodore P. Klupinski,<sup>\*,†</sup> Erich D. Strozier,<sup>†</sup> David A. Friedenber,<sup>†</sup> Marielle C. Brinkman,<sup>†</sup>  
Sydney M. Gordon,<sup>†</sup> Pamela I. Clark<sup>‡</sup>

<sup>†</sup> Battelle, 505 King Avenue, Columbus, Ohio 43201

<sup>‡</sup> School of Public Health, Department of Behavioral and Community Health, Tobacco Center of  
Regulatory Science, University of Maryland, College Park, Maryland 20742

\* To whom correspondence should be addressed: Tel: 614-424-7595. E-mail:

klupinskit@battelle.org.

**Table S1. Package Information for Little Cigar Products Tested**

| Product Name            | Complete Text on Front of Package                                                                                       |
|-------------------------|-------------------------------------------------------------------------------------------------------------------------|
| Swisher Sweets Original | Swisher Sweets; Little Cigars; Swisher Sweets;<br>Filtered Little Cigars; 20; Smooth • Sweet • Satisfying               |
| Swisher Sweets Cherry   | Swisher Sweets; Little Cigars; Swisher Sweets; Sweet Cherry;<br>Filtered Little Cigars; 20; Smooth • Sweet • Satisfying |
| Cheyenne Full Flavor    | 20 Cigars; Cheyenne; Full Flavor; 100's; Made in U.S.A.                                                                 |
| Cheyenne Menthol        | 20 Cigars; Cheyenne; Menthol; 100's; Made in U.S.A.                                                                     |

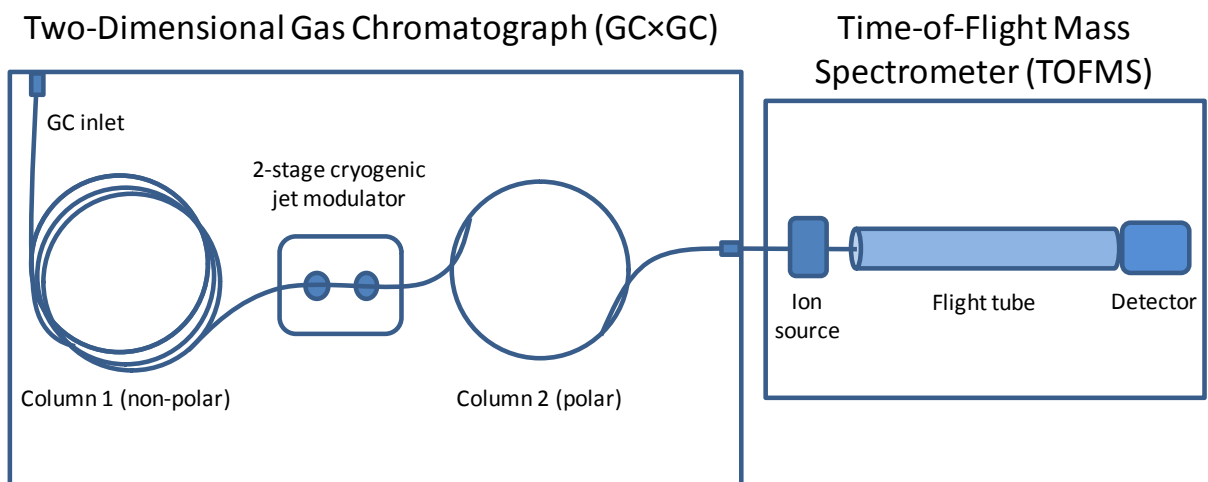

**Figure S1.** Schematic illustration of two-dimensional gas chromatograph–time-of-flight mass spectrometer.

**Table S2. Acquisition Parameters for Two-Dimensional Gas Chromatography–Time-of-Flight Mass Spectrometry for Mainstream Smoke Analyses**

| <i>Two-Dimensional Gas Chromatography</i> |                                                                                                                                                                                                                                                                                                                                 |
|-------------------------------------------|---------------------------------------------------------------------------------------------------------------------------------------------------------------------------------------------------------------------------------------------------------------------------------------------------------------------------------|
| 1st-dimension column                      | 100% dimethylpolysiloxane: 30 m, 250 $\mu\text{m}$ i.d., 1.0 $\mu\text{m}$ film                                                                                                                                                                                                                                                 |
| 2nd-dimension column                      | 50% phenyl polysilphenylene-siloxane: 1 m, 100 $\mu\text{m}$ i.d., 0.1 $\mu\text{m}$ film                                                                                                                                                                                                                                       |
| Inlet temperature                         | 250 $^{\circ}\text{C}$                                                                                                                                                                                                                                                                                                          |
| Main oven temperature program             | 45 $^{\circ}\text{C}$ (1.5 min hold)<br>45 $^{\circ}\text{C}$ – 100 $^{\circ}\text{C}$ @ 20 $^{\circ}\text{C}/\text{min}$<br>100 $^{\circ}\text{C}$ – 270 $^{\circ}\text{C}$ @ 3 $^{\circ}\text{C}/\text{min}$ ; hold 1 min<br>270 $^{\circ}\text{C}$ – 320 $^{\circ}\text{C}$ @ 20 $^{\circ}\text{C}/\text{min}$ , hold 16 min |
| Secondary oven temperature program        | 80 $^{\circ}\text{C}$ (1.5 min hold)<br>80 $^{\circ}\text{C}$ – 275 $^{\circ}\text{C}$ @ 3 $^{\circ}\text{C}/\text{min}$<br>275 $^{\circ}\text{C}$ – 330 $^{\circ}\text{C}$ @ 20 $^{\circ}\text{C}/\text{min}$ , hold 11 min                                                                                                    |
| Modulation temperature                    | 20 $^{\circ}\text{C}$ above 1st-dimension column temperature                                                                                                                                                                                                                                                                    |
| Modulation period                         | 3 seconds                                                                                                                                                                                                                                                                                                                       |
| Carrier gas (He) flow rate                | 1.5 mL/min constant flow                                                                                                                                                                                                                                                                                                        |
| Injection volume                          | 1 $\mu\text{L}$ splitless for 60 seconds                                                                                                                                                                                                                                                                                        |
| <i>Time-of-Flight Mass Spectrometry</i>   |                                                                                                                                                                                                                                                                                                                                 |
| Transfer line temperature                 | 290 $^{\circ}\text{C}$                                                                                                                                                                                                                                                                                                          |
| Ion source temperature                    | 200 $^{\circ}\text{C}$                                                                                                                                                                                                                                                                                                          |
| Detector voltage                          | Tune voltage + 200V                                                                                                                                                                                                                                                                                                             |
| Data rate, range                          | 100 spectra/sec, 35–600 amu                                                                                                                                                                                                                                                                                                     |
| Mass resolution                           | Unit resolution                                                                                                                                                                                                                                                                                                                 |

### Methods for Confirmation Analysis

Confirmation analysis was performed for ambrox, 3-methylbutanenitrile, and 4-methylimidazole, the tentatively identified New/Distinctive Exposure Candidates that were selected as described in the “Results” section. To achieve this objective, aliquots of some concentrated extracts were spiked with authentic standards of the compounds and analyzed by either GC $\times$ GC-TOFMS or LC-MS/MS. GC $\times$ GC-TOFMS analysis was used for confirmation analysis of ambrox and 3-methylbutanenitrile, which have low to moderate polarity. LC-

MS/MS analysis was used for confirmation analysis of 4-methylimidazole, which is polar and alkaline.

Confirmation studies were performed by concurrent analyses of the spiked samples and non-spiked (i.e., “native”) samples. The native samples were modified as needed using co-solvents and internal standards to yield compositions equivalent to the spiked extracts other than the inclusion of the authentic materials. A compound was considered a confirmed detection if the retention times, peak shapes, and mass spectra for the native extracts were consistent with those for the spiked extracts and spiked blanks. When the presence of a compound in a sample was confirmed, the peak responses for the paired spiked and native solutions were evaluated to provide a semi-quantitative estimate of the concentration in the native solution, assuming a linear response factor. In addition, an approximate detection limit was determined from the chromatogram for each spiked solution using interpolation to estimate the minimum concentration needed to yield a signal-to-noise ratio sufficiently large to enable compound detection. For a given compound, the largest value for any calculated approximate detection limit was reported as the estimated detection limit.

Concentrated stock solutions were prepared from authentic standards of the three compounds. For each of ten concentrated extracts—one from each of the eight tobacco products tested and two blanks—a 40- $\mu$ L aliquot was spiked with the internal standard acenaphthene-*d*<sub>10</sub> and stock solutions of ambrox and 3-methylbutanenitrile, yielding spiked concentrations of 0.5  $\mu$ g/mL for ambrox and 1  $\mu$ g/mL for 3-methylbutanenitrile. The spiked and native solutions were analyzed by GC $\times$ GC-TOFMS for confirmation analysis using the same method employed in the original sample analyses. Similarly, for each of ten concentrated extracts—one from each of the eight tobacco products tested and two blanks—an 8- $\mu$ L aliquot was diluted 120-fold into

2/98 (volume/volume) methanol/water and spiked with a stock solution of 4-methylimidazole, yielding spiked concentrations of 7.5 ng/mL for cigarette samples and 30 ng/mL for little cigar samples and blanks. The spiked and native solutions were analyzed by LC–MS/MS for confirmation analysis using the analytical conditions indicated in Table S3.

**Table S3. Acquisition Parameters for Liquid Chromatography–Tandem Mass Spectrometry for Mainstream Smoke Analyses**

| <i>Ultra Performance Liquid Chromatography (UPLC)</i> |                                                                                                                           |                    |                  |
|-------------------------------------------------------|---------------------------------------------------------------------------------------------------------------------------|--------------------|------------------|
| UPLC system                                           | Waters Acquity H-Class                                                                                                    |                    |                  |
| UPLC column                                           | Restek Pinnacle DB PFP (Pentafluorophenyl) Propyl,<br>2.1 × 100 mm, 1.9 μm                                                |                    |                  |
| Column temperature                                    | 40 °C                                                                                                                     |                    |                  |
| Mobile phases                                         | A: 2 mM each of formic acid and ammonium formate in water<br>B: 2 mM each of formic acid and ammonium formate in methanol |                    |                  |
| Gradient                                              | Time (min)                                                                                                                | Flow Rate (mL/min) | % Mobile Phase B |
|                                                       | 0                                                                                                                         | 0.4                | 2                |
|                                                       | 1                                                                                                                         | 0.4                | 2                |
|                                                       | 5                                                                                                                         | 0.4                | 42               |
|                                                       | 5.01                                                                                                                      | 0.5                | 100              |
|                                                       | 6.5                                                                                                                       | 0.5                | 100              |
|                                                       | 6.51                                                                                                                      | 0.4                | 2                |
|                                                       | 9                                                                                                                         | 0.4                | 2                |
| Injection volume                                      | 25 μL                                                                                                                     |                    |                  |
| Run time                                              | 9 minutes                                                                                                                 |                    |                  |
| <i>Tandem Mass Spectrometry</i>                       |                                                                                                                           |                    |                  |
| Mass spectrometer                                     | Micromass Quattro Premier, triple quadrupole                                                                              |                    |                  |
| Ionization method                                     | Electrospray (Positive Mode)                                                                                              |                    |                  |
| Capillary voltage                                     | 0.2 kV                                                                                                                    |                    |                  |
| Source temperature                                    | 100 °C                                                                                                                    |                    |                  |
| Desolvation temperature                               | 500 °C                                                                                                                    |                    |                  |
| Desolvation gas                                       | Nitrogen, 1000 L/hr                                                                                                       |                    |                  |
| Collision cell pressure                               | ~2 × 10 <sup>-3</sup> mbar                                                                                                |                    |                  |
| Collision gas                                         | Argon                                                                                                                     |                    |                  |
| Multiple reaction monitoring (MRM) ion transitions    | 1° (quantifier): 83 > 56<br>2° (qualifier): 83 > 42                                                                       |                    |                  |
| Cone voltage                                          | 35 V                                                                                                                      |                    |                  |
| Collision energies                                    | 15 eV for all ion transitions                                                                                             |                    |                  |

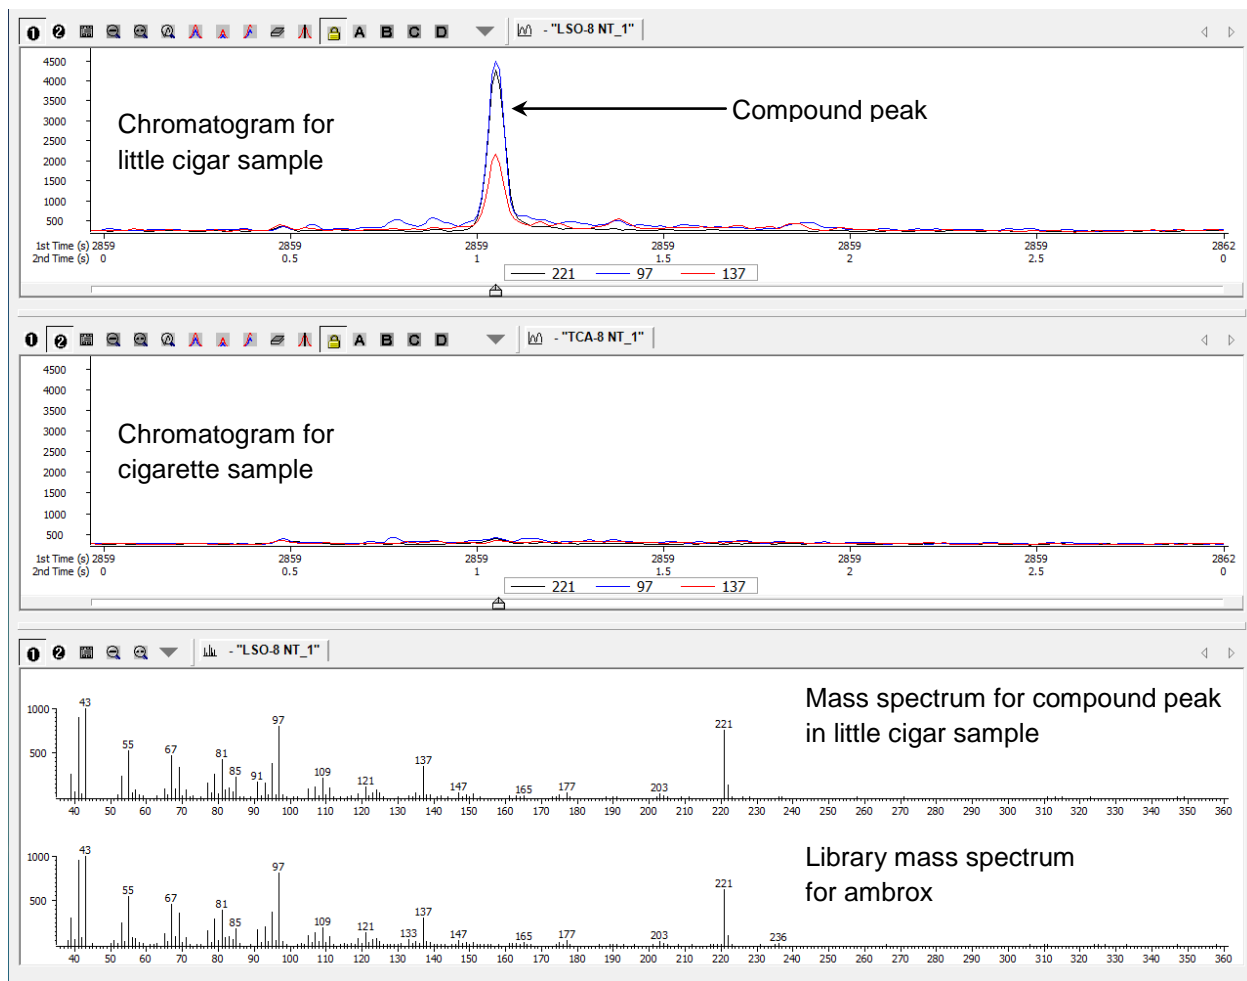

**Figure S2.** Example of extracted ion chromatograms (m/z 221, 97, and 137) and mass spectra for detection of ambrox by GC×GC-TOFMS.



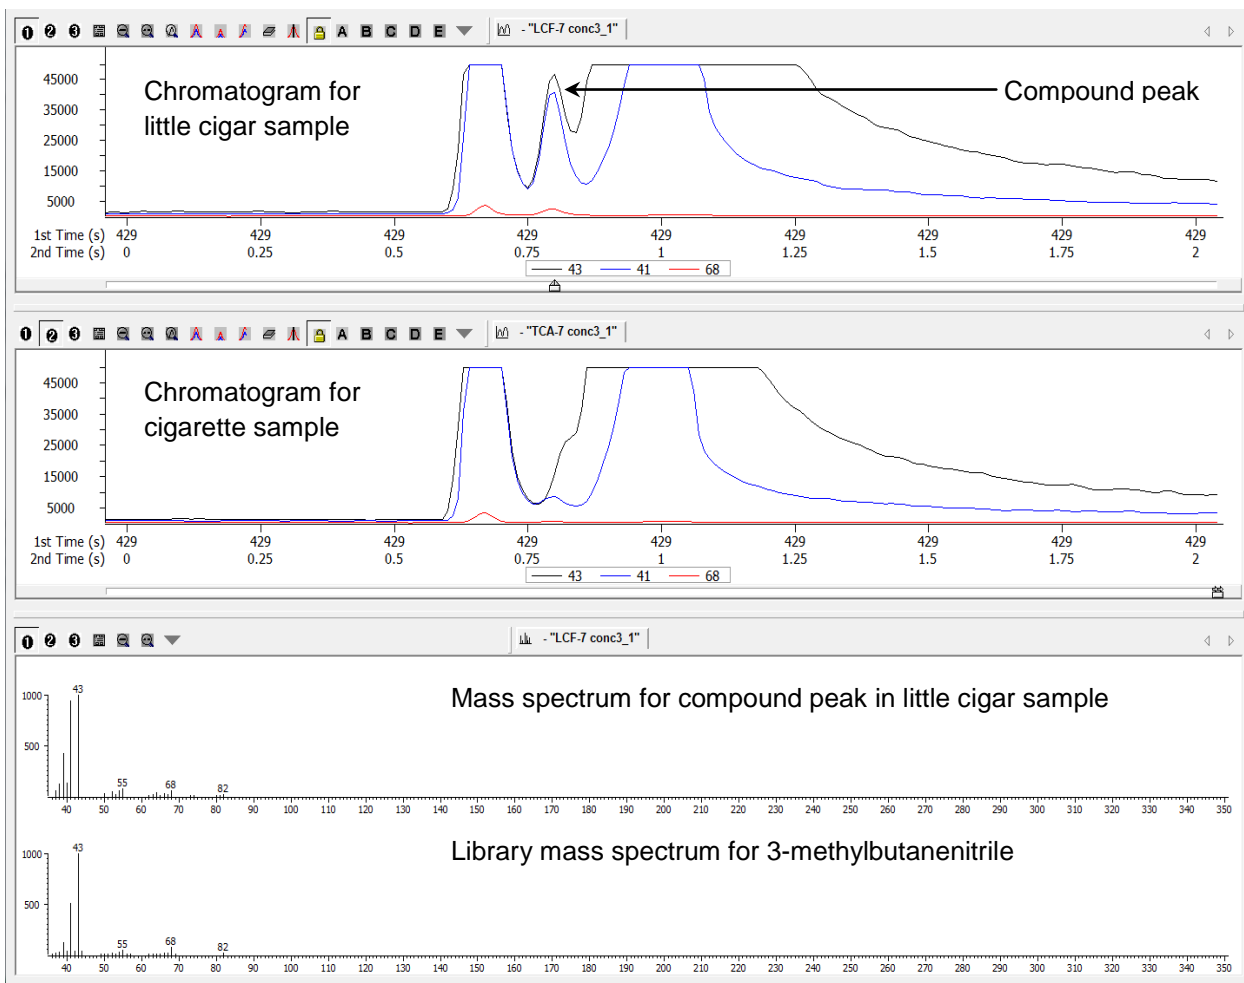

**Figure S3.** Example of extracted ion chromatograms (m/z 43, 41, and 68) and mass spectra for detection of 3-methylbutanenitrile by GC×GC-TOFMS.

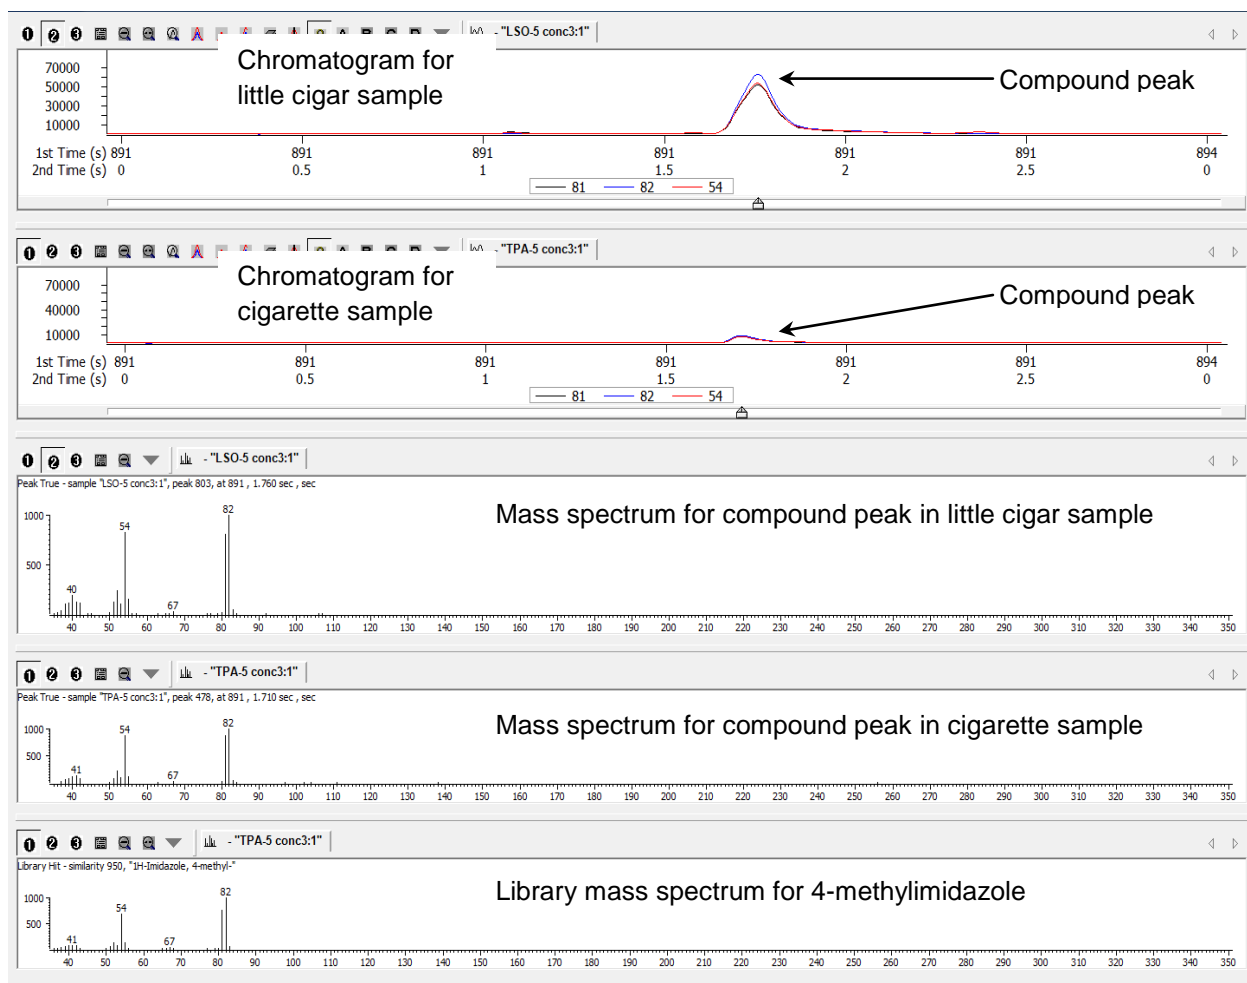

**Figure S4.** Example of extracted ion chromatograms (m/z 81, 82, and 54) and mass spectra for detection of 4-methylimidazole by GC×GC-TOFMS.
